# Supplementary material
Source: publisher figshare collection journal article supplement (https://diabetesjournals.figshare.com/ndownloader/files/30613578)
Supplement: Supplementary file 1 [file 30613578]

## Sheet: Supplementary Table-info
Supplementary Tables
Supplementary Table 1 - Baseline characteristics of NFG participants according to diabetes status by end of 5-year follow-up
Supplementary Table 2 - List of known fasting plasma lipids whose baseline levels predict 5-year or 16-year risk of T2D in American Indians (q<0.05)
Supplementary Table 3 - A full list of fasting plasma lipids whose baseline levels predict risk of T2D during 5-year follow-up and 16-year follow-up
Supplementary Table 4 - A full list of fasting plasma lipids whose baseline levels predict risk of IFG during 5-year follow-up
Supplementary Table 5 - Longitudinal associations between 5-year changes in fasting plasma lipids and changes in diabetes-related traits during 5-year follow up* (568 lipids showed associations with at least one trait at q<0.05)
Supplementary Table 6 - Associations between 5-year change (baseline to 5-year follow-up) in the 230 known lipids (whose longitudinal changes associated with one or more continuous T2D traits) and 16-year risk of T2D (q<0.05)
Supplementary Table 7 - Full list of plasma lipids with VIP greater than 1.5
Supplementary Table 8 - Results for sensitivity analysis (baseline lipids predict risk of T2D after 5-year follow-up) by further adjusting for diet, physical activity and lipid-lowering drugs

## Sheet: S1-Baseline characteristics
Supplementary Table 1 - Baseline characteristics of NFG participants according to diabetes status by end of 5-year follow-up
Characteristics	T2D (N=73)	IFG (N=205)	NFG (N=883)	P-value† (T2D vs. NFG)	P-value† (IFG vs. NFG)
Age (years)	35.8 ± 11.3	36.5 ± 12.7	36.0 ± 13.1	0.9	0.57
Female, n (%)	44 (60%)	123 (60%)	570 (65%)	0.45	0.2
BMI (kg/m2)	34.9 ± 7.6	31.9 ± 6.9	29.1 ± 6.4	6.25×10-12	5.37×10-9
Waist (cm)	110.4 ± 18.4	103.0 ± 16.2	96.0 ± 15.6	4.43×10-10	3.12×10-8
SBP (mmHg)	123.4 ± 14.1	121.9 ± 13.6	118.9 ± 14.7	4.98×10-3	3.54×10-3
DBP (mmHg)	79.0 ± 9.9	78.5 ± 9.7	75.4 ± 10.6	1.82×10-3	4.24×10-5
HDL (mg/dL)	49.1 ± 15.5	51.2 ± 12.7	54.5 ± 15.3	0.01	2.64×10-3
LDL (mg/dL)	101.8 ± 29.0	103.5 ± 29.7	99.5 ± 29.1	0.5	0.08
Triglycerides (mg/dL)	177.9 ± 124.8	151.2 ± 73.3	136.1 ± 79.9	1.28×10-3	0.02
Total cholesterol (mg/dL)	184.3 ± 35.1	184.8 ± 34.9	181.1 ± 33.5	0.45	0.16
Fasting glucose (mg/dL)	91.3 ± 6.5	91.0 ± 6.8	88.4 ± 6.4	2.34×10-3	6.29×10-5
Fasting insulin (µU/ml)	21.1 ± 16.0	14.5 ± 10.1	11.9 ± 10.3	1.74×10-6	7.58×10-3
HOMA-IR	4.7 ± 3.5	3.3 ± 2.3	2.6 ± 2.3	1.41×10-6	3.88×10-3
HOMA-β	295.8 ± 273.5	193.5 ± 153.7	177.2 ± 155.9	2.64×10-7	0.18
QUICKI	0.14 ± 0.01	0.14 ± 0.01	0.15 ± 0.02	2.19×10-9	1.56×10-5
Data are mean ± SD unless otherwise indicated.
†P-values were obtained by generalized estimating equation (GEE) model accounting for correlation among family members.

## Sheet: S2-Known lipids with T2D
Supplementary Table 2 - List of known fasting plasma lipids whose baseline levels predict 5-year or 16-year risk of T2D in American Indians (q<0.05)
Lipid	Class	5-year OR (95% CI)†	16-year OR (95% CI)†
DAG(34:1)	Diacylglycerols	2.85 (1.86, 4.39)	1.27 (0.95, 1.69)
DAG(16:0/16:1)	Diacylglycerols	2.36 (1.47, 3.78)	1.56 (1.14, 2.14)
DAG(36:1)	Diacylglycerols	2.25 (1.49, 3.40)	1.34 (1.00, 1.79)
DAG(34:2)	Diacylglycerols	2.21 (1.44, 3.40)	1.15 (0.86, 1.54)
DAG(16:0/16:0)	Diacylglycerols	2.13 (1.45, 3.13)	1.62 (1.23, 2.14)
PC(38:3)	Phosphocholines	1.90 (1.31, 2.75)	1.26 (1.01, 1.58)
PC(32:0)	Phosphocholines	1.76 (1.24, 2.50)	1.16 (0.94, 1.44)
PC(38:2)	Phosphocholines	1.68 (1.22, 2.32)	1.13 (0.92, 1.39)
PE(18:0/20:3)	Phosphoethanolamines	2.02 (1.41, 2.90)	1.41 (1.11, 1.79)
PE(36:2)	Phosphoethanolamines	2.02 (1.36, 3.00)	1.33 (1.03, 1.70)
PE(34:1)	Phosphoethanolamines	1.94 (1.36, 2.77)	1.36 (1.08, 1.72)
PE(34:2) B	Phosphoethanolamines	1.91 (1.31, 2.77)	1.36 (1.07, 1.72)
PE(16:0/16:1)	Phosphoethanolamines	1.85 (1.32, 2.59)	1.45 (1.15, 1.83)
PE(16:0/18:3)	Phosphoethanolamines	1.79 (1.26, 2.55)	1.34 (1.06, 1.70)
PE(36:4) B	Phosphoethanolamines	1.78 (1.25, 2.54)	1.28 (1.02, 1.61)
PE(p-38:5)/PE(o-38:6) B	Phosphoethanolamines	1.76 (1.28, 2.42)	1.07 (0.88, 1.29)
PE(p-34:1)/PE(o-34:2) B	Phosphoethanolamines	1.65 (1.21, 2.25)	1.23 (1.01, 1.50)
LPE(22:4)	Phosphoethanolamines	1.62 (1.20, 2.18)	1.26 (1.03, 1.53)
PE(p-16:0/22:4)/PE(o-16:1/22:4)	Phosphoethanolamines	1.50 (1.19, 1.88)	0.96 (0.80, 1.15)
TG(48:1)	Triacylglycerols	2.16 (1.42, 3.26)	1.44 (1.11, 1.86)
TG(49:1)	Triacylglycerols	2.12 (1.42, 3.17)	1.30 (1.01, 1.67)
TG(52:1)	Triacylglycerols	2.10 (1.42, 3.12)	1.37 (1.06, 1.76)
TG(46:0)	Triacylglycerols	2.02 (1.41, 2.87)	1.48 (1.17, 1.86)
TG(51:1)	Triacylglycerols	2.02 (1.35, 3.01)	1.19 (0.92, 1.55)
TG(48:2)	Triacylglycerols	2.00 (1.30, 3.06)	1.23 (0.95, 1.60)
TG(47:0)/TG(14:0/16:0/17:0)	Triacylglycerols	1.94 (1.41, 2.68)	1.32 (1.06, 1.65)
TG(50:0)	Triacylglycerols	1.88 (1.35, 2.61)	1.33 (1.07, 1.65)
TG(47:1)	Triacylglycerols	1.87 (1.30, 2.69)	1.24 (0.98, 1.57)
TG(47:1)/TG(14:0/15:0/18:1)	Triacylglycerols	1.86 (1.29, 2.70)	1.26 (0.99, 1.60)
TG(49:0)	Triacylglycerols	1.85 (1.34, 2.57)	1.29 (1.03, 1.62)
TG(46:1)	Triacylglycerols	1.83 (1.25, 2.66)	1.28 (1.00, 1.63)
TG(51:0)/TG(16:0/17:0/18:0)	Triacylglycerols	1.68 (1.23, 2.29)	1.11 (0.89, 1.38)
TG(45:0)/TG(14:0/15:0/16:0)	Triacylglycerols	1.59 (1.19, 2.12)	1.24 (1.01, 1.51)
†Odds ratio (OR) obtained from mixed-effect logistic regression. The model adjusted for age, sex, study site, BMI, fasting glucose, insulin resistance, HDL-cholesterol and total triglycerides at baseline. Random effect was included in the model to account for correlations among family members.
Bolded lipids denote those significantly associated with both 5-year and 16-year risk of T2D.

## Sheet: S3-Lipids with T2D
Supplementary Table 3 - A full list of fasting plasma lipids whose baseline levels predict risk of T2D during 5-year follow-up and 16-year follow-up
Lipid	Class	5-year OR (95% CI)†	16-year OR (95% CI)†
DAG(34:1)	Diacylglycerols	2.85 (1.86, 4.39)	1.27 (0.95, 1.69)
DAG(16:0/16:1)	Diacylglycerols	2.36 (1.47, 3.78)	1.56 (1.14, 2.14)
DAG(36:1)	Diacylglycerols	2.25 (1.49, 3.40)	1.34 (1.00, 1.79)
DAG(34:2)	Diacylglycerols	2.21 (1.44, 3.40)	1.15 (0.86, 1.54)
DAG(16:0/16:0)	Diacylglycerols	2.13 (1.45, 3.13)	1.62 (1.23, 2.14)
PC(38:3)	Phosphocholines	1.90 (1.31, 2.75)	1.26 (1.01, 1.58)
PC(32:0)	Phosphocholines	1.76 (1.24, 2.50)	1.16 (0.94, 1.44)
PC(38:2)	Phosphocholines	1.68 (1.22, 2.32)	1.13 (0.92, 1.39)
PE(18:0/20:3)	Phosphoethanolamines	2.02 (1.41, 2.90)	1.41 (1.11, 1.79)
PE(36:2)	Phosphoethanolamines	2.02 (1.36, 3.00)	1.33 (1.03, 1.70)
PE(34:1)	Phosphoethanolamines	1.94 (1.36, 2.77)	1.36 (1.08, 1.72)
PE(34:2) B	Phosphoethanolamines	1.91 (1.31, 2.77)	1.36 (1.07, 1.72)
PE(16:0/16:1)	Phosphoethanolamines	1.85 (1.32, 2.59)	1.45 (1.15, 1.83)
PE(16:0/18:3)	Phosphoethanolamines	1.79 (1.26, 2.55)	1.34 (1.06, 1.70)
PE(36:4) B	Phosphoethanolamines	1.78 (1.25, 2.54)	1.28 (1.02, 1.61)
PE(p-38:5)/PE(o-38:6) B	Phosphoethanolamines	1.76 (1.28, 2.42)	1.07 (0.88, 1.29)
PE(p-34:1)/PE(o-34:2) B	Phosphoethanolamines	1.65 (1.21, 2.25)	1.23 (1.01, 1.50)
LPE(22:4)	Phosphoethanolamines	1.62 (1.20, 2.18)	1.26 (1.03, 1.53)
PE(p-16:0/22:4)/PE(o-16:1/22:4)	Phosphoethanolamines	1.50 (1.19, 1.88)	0.96 (0.80, 1.15)
TG(48:1)	Triacylglycerols	2.16 (1.42, 3.26)	1.44 (1.11, 1.86)
TG(49:1)	Triacylglycerols	2.12 (1.42, 3.17)	1.30 (1.01, 1.67)
TG(52:1)	Triacylglycerols	2.10 (1.42, 3.12)	1.37 (1.06, 1.76)
TG(46:0)	Triacylglycerols	2.02 (1.41, 2.87)	1.48 (1.17, 1.86)
TG(51:1)	Triacylglycerols	2.02 (1.35, 3.01)	1.19 (0.92, 1.55)
TG(48:2)	Triacylglycerols	2.00 (1.30, 3.06)	1.23 (0.95, 1.60)
TG(47:0)/TG(14:0/16:0/17:0)	Triacylglycerols	1.94 (1.41, 2.68)	1.32 (1.06, 1.65)
TG(50:0)	Triacylglycerols	1.88 (1.35, 2.61)	1.33 (1.07, 1.65)
TG(47:1)	Triacylglycerols	1.87 (1.30, 2.69)	1.24 (0.98, 1.57)
TG(47:1)/TG(14:0/15:0/18:1)	Triacylglycerols	1.86 (1.29, 2.70)	1.26 (0.99, 1.60)
TG(49:0)	Triacylglycerols	1.85 (1.34, 2.57)	1.29 (1.03, 1.62)
TG(46:1)	Triacylglycerols	1.83 (1.25, 2.66)	1.28 (1.00, 1.63)
TG(51:0)/TG(16:0/17:0/18:0)	Triacylglycerols	1.68 (1.23, 2.29)	1.11 (0.89, 1.38)
TG(45:0)/TG(14:0/15:0/16:0)	Triacylglycerols	1.59 (1.19, 2.12)	1.24 (1.01, 1.51)
Unknown_320	Unknown	5.22 (1.86, 14.63)	1.25 (0.91, 1.70)
Unknown_437	Unknown	2.50 (1.64, 3.81)	1.61 (1.25, 2.08)
Unknown_392	Unknown	2.42 (1.58, 3.73)	1.14 (0.84, 1.54)
Unknown_393	Unknown	2.29 (1.57, 3.32)	1.58 (1.24, 2.02)
Unknown_1189	Unknown	2.18 (1.43, 3.31)	1.37 (1.07, 1.75)
Unknown_391	Unknown	2.14 (1.52, 3.01)	1.45 (1.19, 1.78)
Unknown_413	Unknown	2.10 (1.40, 3.16)	1.39 (1.07, 1.81)
Unknown_365	Unknown	2.08 (1.42, 3.06)	1.42 (1.11, 1.82)
Unknown_319	Unknown	1.99 (1.31, 3.01)	1.28 (0.97, 1.69)
Unknown_411	Unknown	1.99 (1.37, 2.88)	1.38 (1.08, 1.77)
Unknown_967	Unknown	1.97 (1.32, 2.94)	1.15 (0.93, 1.43)
Unknown_438	Unknown	1.96 (1.36, 2.83)	1.42 (1.12, 1.79)
Unknown_1085	Unknown	1.91 (1.34, 2.71)	1.27 (1.02, 1.58)
Unknown_254	Unknown	1.87 (1.33, 2.64)	1.11 (0.90, 1.37)
Unknown_1132	Unknown	1.86 (1.30, 2.66)	1.30 (1.03, 1.65)
Unknown_941	Unknown	1.86 (1.30, 2.66)	1.19 (0.97, 1.46)
Unknown_394	Unknown	1.80 (1.29, 2.51)	1.53 (1.23, 1.91)
Unknown_461	Unknown	1.80 (1.28, 2.52)	1.28 (1.03, 1.59)
Unknown_459	Unknown	1.78 (1.30, 2.45)	1.38 (1.11, 1.70)
Unknown_1008	Unknown	1.74 (1.25, 2.43)	1.32 (1.06, 1.65)
Unknown_1128	Unknown	1.73 (1.25, 2.38)	1.23 (1.00, 1.52)
Unknown_977	Unknown	1.69 (1.27, 2.25)	1.07 (0.88, 1.29)
Unknown_594	Unknown	1.64 (1.23, 2.20)	1.26 (1.03, 1.55)
†Odds ratio (OR) obtained from mixed-effect logistic regression. The model adjusted for age, sex, study site, BMI, fasting glucose, insulin resistance, HDL-cholesterol and total triglycerides at baseline. Random effect was included in the model to account for correlations among family members.
All lipids for 5-year risk were significant at q<0.05. Bolded lipids were significantly associated with both 5-year and 16-year risk of T2D.

## Sheet: S4-Lipids with IFG
Supplementary Table 4 - A full list of fasting plasma lipids whose baseline levels predict risk of IFG during 5-year follow-up
Lipid	Class	5-year OR (95% CI)†
DAG(16:0/16:1)	Diacylglycerols	1.88 (1.40, 2.54)
DAG(36:1)	Diacylglycerols	1.87 (1.43, 2.44)
DAG(16:0/16:0)	Diacylglycerols	1.79 (1.39, 2.32)
DAG(34:1)	Diacylglycerols	1.75 (1.33, 2.31)
PC(32:1)	Phosphocholines	1.50 (1.22, 1.84)
PC(34:1)	Phosphocholines	1.44 (1.17, 1.78)
PC(38:2)	Phosphocholines	1.35 (1.12, 1.64)
PC(p-18:1/20:4)/PC(o-18:2/20:4)	Phosphocholines	0.78 (0.67, 0.90)
PC(17:1/22:5)	Phosphocholines	0.76 (0.64, 0.91)
PC(39:6)	Phosphocholines	0.75 (0.63, 0.88)
LPC(20:4) B	Phosphocholines	0.70 (0.58, 0.85)
PE(36:4) A	Phosphoethanolamines	2.19 (1.33, 3.61)
PE(36:2)	Phosphoethanolamines	1.71 (1.35, 2.18)
PE(34:1)	Phosphoethanolamines	1.65 (1.33, 2.05)
PE(34:2) B	Phosphoethanolamines	1.65 (1.32, 2.08)
PE(16:0/16:1)	Phosphoethanolamines	1.64 (1.32, 2.03)
PE(18:0/20:3)	Phosphoethanolamines	1.60 (1.27, 2.01)
PE(18:0/22:4)	Phosphoethanolamines	1.47 (1.20, 1.80)
PE(36:3)	Phosphoethanolamines	1.43 (1.16, 1.76)
PE(18:1/18:1)	Phosphoethanolamines	1.42 (1.15, 1.76)
PE(36:4) B	Phosphoethanolamines	1.41 (1.15, 1.74)
PE(18:0/22:5) B	Phosphoethanolamines	1.39 (1.13, 1.71)
PE(36:1) B	Phosphoethanolamines	1.35 (1.12, 1.63)
PE(34:3e)/PE(16:0e/18:3)	Phosphoethanolamines	1.33 (1.11, 1.58)
PE(p-34:1)/PE(o-34:2) B	Phosphoethanolamines	1.32 (1.10, 1.59)
PG(18:0/18:2)	Phosphoglycerols	1.43 (1.16, 1.74)
PI(16:0/16:1)	Phosphoinositols	1.45 (1.19, 1.77)
PI(16:0/18:1)	Phosphoinositols	1.43 (1.17, 1.76)
PI(18:0/20:3) A	Phosphoinositols	1.35 (1.12, 1.62)
SM(d34:0) B	Sphingomyelins	1.30 (1.10, 1.54)
SM(d40:3)	Sphingomyelins	0.75 (0.63, 0.89)
CE(16:1)	Sterol esters	1.43 (1.19, 1.72)
TG(48:1)	Triacylglycerols	1.67 (1.31, 2.13)
TG(52:1)	Triacylglycerols	1.66 (1.31, 2.11)
TG(50:2)	Triacylglycerols	1.64 (1.26, 2.14)
TG(46:0)	Triacylglycerols	1.55 (1.26, 1.91)
TG(48:2)	Triacylglycerols	1.54 (1.20, 1.97)
TG(50:0)	Triacylglycerols	1.53 (1.22, 1.92)
TG(46:1)	Triacylglycerols	1.53 (1.25, 1.89)
TG(49:1)	Triacylglycerols	1.50 (1.18, 1.90)
TG(51:1)	Triacylglycerols	1.49 (1.17, 1.90)
TG(54:2)	Triacylglycerols	1.48 (1.16, 1.88)
TG(44:0)	Triacylglycerols	1.41 (1.15, 1.72)
TG(47:0)/TG(14:0/16:0/17:0)	Triacylglycerols	1.41 (1.14, 1.73)
TG(47:1)/TG(14:0/15:0/18:1)	Triacylglycerols	1.41 (1.13, 1.76)
TG(54:1)	Triacylglycerols	1.41 (1.13, 1.75)
TG(47:1)	Triacylglycerols	1.40 (1.13, 1.74)
TG(49:0)	Triacylglycerols	1.39 (1.13, 1.72)
TG(44:1)	Triacylglycerols	1.38 (1.12, 1.69)
Unknown_413	Unknown	1.78 (1.39, 2.28)
Unknown_1008	Unknown	1.69 (1.37, 2.08)
Unknown_411	Unknown	1.69 (1.33, 2.13)
Unknown_414	Unknown	1.69 (1.34, 2.14)
Unknown_367	Unknown	1.66 (1.28, 2.15)
Unknown_412	Unknown	1.64 (1.28, 2.11)
Unknown_1078	Unknown	1.62 (1.30, 2.02)
Unknown_365	Unknown	1.62 (1.29, 2.04)
Unknown_393	Unknown	1.59 (1.27, 1.99)
Unknown_110	Unknown	1.54 (1.25, 1.89)
Unknown_364	Unknown	1.54 (1.23, 1.93)
Unknown_1133	Unknown	1.53 (1.24, 1.88)
Unknown_395	Unknown	1.52 (1.18, 1.98)
Unknown_464	Unknown	1.49 (1.16, 1.91)
Unknown_1132	Unknown	1.48 (1.20, 1.83)
Unknown_391	Unknown	1.47 (1.19, 1.80)
Unknown_369	Unknown	1.46 (1.20, 1.78)
Unknown_368	Unknown	1.44 (1.18, 1.76)
Unknown_421	Unknown	1.43 (1.15, 1.78)
Unknown_874	Unknown	1.42 (1.18, 1.70)
Unknown_1120	Unknown	1.41 (1.16, 1.70)
Unknown_179	Unknown	1.41 (1.16, 1.71)
Unknown_422	Unknown	1.41 (1.13, 1.75)
Unknown_1046	Unknown	1.40 (1.14, 1.71)
Unknown_1122	Unknown	1.40 (1.14, 1.70)
Unknown_1020	Unknown	1.38 (1.14, 1.68)
Unknown_983	Unknown	1.38 (1.14, 1.66)
Unknown_871	Unknown	1.37 (1.12, 1.66)
Unknown_107	Unknown	1.36 (1.14, 1.63)
Unknown_178	Unknown	1.36 (1.13, 1.64)
Unknown_103	Unknown	1.35 (1.13, 1.62)
Unknown_147	Unknown	1.35 (1.11, 1.64)
Unknown_999	Unknown	1.33 (1.11, 1.59)
Unknown_1125	Unknown	1.32 (1.11, 1.57)
Unknown_947	Unknown	0.78 (0.66, 0.92)
Unknown_317	Unknown	0.76 (0.63, 0.90)
Unknown_318	Unknown	0.76 (0.64, 0.90)
Unknown_188	Unknown	0.73 (0.62, 0.87)
Unknown_191	Unknown	0.73 (0.62, 0.87)
Unknown_190	Unknown	0.72 (0.60, 0.87)
Unknown_1058	Unknown	0.71 (0.60, 0.84)
†Odds ratio (OR) obtained from mixed-effect logistic regression. The model adjusted for age, sex, study site, BMI, fasting glucose, insulin resistance, HDL-cholesterol and total triglycerides at baseline. Random effect was included in the model to account for correlations among family members.
Bolded lipids were significantly associated with 5-year risk of T2D.

## Sheet: S5-Lipid changes with T2D trait
Supplementary Table 5 - Longitudinal associations between 5-year changes in fasting plasma lipids and changes in diabetes-related traits during 5-year follow up* (568 lipids showed associations with at least one trait at q<0.05)
Lipid	Class	β for FPG	q-value for FPG	Ve (%) for FPG	β for FPI	q-value for FPI	Ve (%) for FPI	β for HOMA-IR	q-value for HOMA-IR	Ve (%) for HOMA-IR	β for HOMA-β	q-value for HOMA-β	Ve (%) for HOMA-β	β for QUICKI	q-value for QUICKI	Ve (%) for QUICKI
AC(10:0)	Acylcarnitines				-0.084	0.045	0.062							0.107	0.003	0.222
AC(10:1)	Acylcarnitines				-0.119	0.002	0.115	-0.118	0.004	0.149	-0.104	0.009	0.181	0.131	<0.001	0.220
AC(11:1)	Acylcarnitines				-0.095	0.017	0.032	-0.096	0.022	0.007				0.081	0.032	0.002
AC(12:1)	Acylcarnitines				-0.150	<0.001	0.319	-0.147	<0.001	0.357	-0.116	0.004	0.240	0.201	<0.001	0.847
AC(14:0)	Acylcarnitines				-0.146	<0.001	0.348	-0.138	0.002	0.312	-0.136	0.001	0.533	0.176	<0.001	1.024
AC(14:1)	Acylcarnitines				-0.123	0.007	0.364	-0.122	0.012	0.362	-0.107	0.022	0.303	0.163	<0.001	1.015
AC(14:2)	Acylcarnitines				-0.151	<0.001	0.359	-0.152	<0.001	0.396	-0.116	0.004	0.281	0.223	<0.001	1.432
AC(16:0)	Acylcarnitines				-0.139	0.001	0.172	-0.132	0.005	0.129	-0.140	0.001	0.437	0.152	<0.001	0.494
AC(16:1)	Acylcarnitines				-0.193	<0.001	0.792	-0.186	<0.001	0.686	-0.176	<0.001	0.932	0.270	<0.001	2.392
AC(18:0)	Acylcarnitines				-0.102	0.031	0.186				-0.101	0.031	0.336	0.125	0.003	0.554
AC(18:1) A	Acylcarnitines				-0.230	<0.001	0.979	-0.224	<0.001	0.944	-0.200	<0.001	0.759	0.304	<0.001	2.153
AC(18:1) B	Acylcarnitines				-0.223	<0.001	1.099	-0.222	<0.001	1.024	-0.172	0.001	0.779	0.296	<0.001	2.299
AC(18:2)	Acylcarnitines	-0.149	0.002	0.557										0.125	0.002	0.279
CE(18:1)	Cholesterol esters				-0.150	<0.001	2.395	-0.136	0.001	1.948	-0.135	<0.001	3.439	0.177	<0.001	6.326
CE(18:2)	Cholesterol esters	-0.083	0.048	1.143	-0.102	0.003	0.464	-0.108	0.003	0.451				0.107	0.001	1.428
CE(20:3)	Cholesterol esters				-0.123	<0.001	0.781	-0.123	0.001	0.790	-0.090	0.015	0.928	0.121	<0.001	0.791
CER(d34:0)	Ceramides	0.140	0.001	2.107										-0.137	<0.001	1.513
CER(d34:2)	Ceramides				-0.116	0.004	0.409	-0.112	0.009	0.436	-0.110	0.005	0.345	0.094	0.014	0.346
CER(d38:1)	Ceramides													-0.071	0.050	2.556
CER(d40:0)	Ceramides	0.103	0.018	1.331										-0.144	<0.001	2.827
Cholesterol	Cholesterol	0.099	0.028	0.060
DAG(16:0/16:0)	Diacylglycerols				0.122	<0.001	0.573	0.119	0.001	0.544	0.092	0.010	0.252	-0.132	<0.001	2.855
DAG(16:0/16:1)	Diacylglycerols				0.092	0.012	1.212	0.095	0.013	1.174				-0.117	<0.001	4.491
DAG(34:1)	Diacylglycerols													-0.101	0.004	3.796
DAG(34:2)	Diacylglycerols				0.104	0.008	1.914	0.098	0.019	1.763				-0.123	<0.001	4.794
DAG(36:1)	Diacylglycerols				0.101	0.005	1.164	0.094	0.017	1.045	0.090	0.015	1.172	-0.119	<0.001	3.612
DAG(36:4) A	Diacylglycerols													-0.085	0.013	2.397
DAG(36:5)	Diacylglycerols				0.211	<0.001	2.267	0.197	<0.001	1.959	0.164	<0.001	1.272	-0.171	<0.001	3.209
DAG(38:5)	Diacylglycerols				0.081	0.026	0.423	0.079	0.039	0.385				-0.078	0.017	1.309
DAG(38:6)	Diacylglycerols				0.139	<0.001	0.806	0.131	<0.001	0.680	0.122	<0.001	0.653	-0.135	<0.001	1.865
FA(10:0)	Fatty acids													0.106	0.049	0.701
FA(14:0)	Fatty acids				-0.185	<0.001	0.648	-0.181	<0.001	0.506	-0.162	<0.001	1.191	0.114	0.010	0.182
FA(14:1)	Fatty acids				-0.229	<0.001	1.044	-0.220	<0.001	0.973	-0.192	<0.001	1.170	0.224	<0.001	0.812
FA(15:0)	Fatty acids				-0.096	0.015	0.018	-0.090	0.034	0.006	-0.087	0.030	0.277
FA(15:1)	Fatty acids				-0.114	0.011	0.694	-0.113	0.019	0.706				0.098	0.019	0.091
FA(16:0)	Fatty acids				-0.094	0.018	0.223	-0.096	0.022	0.249
FA(16:1)	Fatty acids				-0.201	<0.001	0.116	-0.191	<0.001	0.102	-0.167	<0.001	0.212	0.188	<0.001	0.179
FA(17:0) A	Fatty acids				-0.163	<0.001	0.071	-0.157	<0.001	0.024	-0.155	<0.001	0.892	0.112	0.004	0.001
FA(17:1)	Fatty acids				-0.265	<0.001	0.692	-0.258	<0.001	0.604	-0.222	<0.001	0.966	0.220	<0.001	0.375
FA(18:0) A	Fatty acids										-0.117	0.011	0.812
FA(18:1)	Fatty acids				-0.314	<0.001	1.826	-0.300	<0.001	1.661	-0.291	<0.001	1.549	0.281	<0.001	1.565
FA(18:3)	Fatty acids				-0.094	0.012	0.093	-0.084	0.039	0.092	-0.105	0.003	0.274	0.090	0.010	0.132
FA(19:1) A	Fatty acids				-0.239	<0.001	0.622	-0.227	<0.001	0.542	-0.229	<0.001	0.927	0.195	<0.001	0.513
FA(19:1) B	Fatty acids				-0.170	<0.001	0.130	-0.159	<0.001	0.120	-0.162	<0.001	0.204	0.124	0.001	0.031
FA(20:1)	Fatty acids				-0.227	<0.001	0.269	-0.210	<0.001	0.194	-0.249	<0.001	0.633	0.198	<0.001	0.291
FA(20:2) A	Fatty acids				-0.216	<0.001	0.055	-0.201	<0.001	0.027	-0.222	<0.001	0.592	0.181	<0.001	0.206
FA(22:0)	Fatty acids													-0.082	0.031	0.389
FA(22:2)	Fatty acids				-0.175	<0.001	0.110	-0.156	<0.001	0.053	-0.200	<0.001	0.884	0.168	<0.001	0.219
FA(22:3)	Fatty acids				-0.173	<0.001	0.005	-0.157	<0.001	0.004	-0.190	<0.001	0.929	0.141	<0.001	0.000
FA(24:1)	Fatty acids				-0.157	0.001	0.483	-0.145	0.004	0.336	-0.180	<0.001	0.957	0.132	0.003	0.860
FA(26:0)	Fatty acids													-0.077	0.035	0.304
FAHFA(16:0/3:0)	Fatty acids				0.165	<0.001	0.418	0.162	<0.001	0.355	0.124	<0.001	0.376	-0.130	<0.001	0.224
FAHFA(18:0/3:0)	Fatty acids				0.139	<0.001	0.431	0.139	<0.001	0.372	0.108	0.001	0.354	-0.107	0.001	0.249
LPC(14:0)	Phosphocholines													-0.143	<0.001	1.329
LPC(15:0)	Phosphocholines	-0.109	0.015	0.563
LPC(18:1)	Phosphocholines													0.114	0.002	2.332
LPC(20:1)	Phosphocholines													0.079	0.041	1.124
LPC(20:4) A	Phosphocholines													0.077	0.038	0.583
LPC(22:4)	Phosphocholines													0.077	0.034	0.806
LPC(24:0)	Phosphocholines													0.107	0.009	1.963
LPI(18:2)	Phosphoinositols	0.104	0.016	0.967										-0.111	0.002	0.752
PC(13:1/26:4)	Phosphocholines	-0.109	0.038	0.570
PC(16:3/26:4)	Phosphocholines	-0.093	0.036	0.925										0.074	0.048	0.958
PC(17:0/20:3)	Phosphocholines	-0.149	0.001	0.724
PC(17:1/22:5)	Phosphocholines	-0.100	0.016	1.592
PC(20:4/22:4)	Phosphocholines													0.079	0.045	0.626
PC(28:0)	Phosphocholines													-0.106	0.005	0.301
PC(30:0)	Phosphocholines													-0.100	0.004	0.113
PC(31:0)	Phosphocholines													-0.100	0.014	0.123
PC(32:1)	Phosphocholines	0.130	0.002	2.450
PC(32:2)	Phosphocholines													-0.090	0.015	0.899
PC(32:3)	Phosphocholines													-0.083	0.017	0.017
PC(33:2)	Phosphocholines													-0.095	0.015	0.521
PC(34:2)	Phosphocholines	0.111	0.038	1.316										-0.155	<0.001	1.713
PC(34:3) A	Phosphocholines													0.087	0.019	0.002
PC(34:4)	Phosphocholines													-0.102	0.005	0.556
PC(36:2)	Phosphocholines	0.142	0.016	1.459	0.182	<0.001	1.605	0.177	0.001	1.526	0.139	0.006	0.588	-0.280	<0.001	3.243
PC(36:4) C	Phosphocholines													0.107	0.014	0.483
PC(36:5) A	Phosphocholines				0.086	0.047	0.505
PC(36:5) C	Phosphocholines													0.080	0.045	0.061
PC(36:6)	Phosphocholines													-0.090	0.016	0.526
PC(37:2)	Phosphocholines													-0.098	0.016	0.196
PC(37:4)	Phosphocholines	-0.097	0.031	1.575	-0.083	0.046	0.544	-0.092	0.032	0.613				0.081	0.033	1.112
PC(38:3)	Phosphocholines				0.107	0.016	1.216	0.098	0.041	1.009				-0.185	<0.001	3.721
PC(38:5) A	Phosphocholines				-0.104	0.016	0.611	-0.097	0.039	0.502				0.182	<0.001	2.061
PC(38:6) C	Phosphocholines													-0.099	0.005	2.428
PC(39:6)	Phosphocholines	-0.109	0.006	2.002										0.086	0.010	0.515
PC(40:5) B	Phosphocholines													-0.080	0.047	0.919
PC(40:7) B	Phosphocholines	-0.100	0.029	1.149										0.138	<0.001	1.762
PC(p-14:0/22:1)/PC(o-14:0/22:1)	Phosphocholines													0.144	<0.001	2.002
PC(p-14:0/24:2)/PC(o-14:0/24:2)	Phosphocholines													0.089	0.020	0.413
PC(p-14:0/26:2)/PC(o-14:1/26:2)	Phosphocholines													0.143	<0.001	1.303
PC(p-16:0/2:0)/PC(o-16:1/2:0)	Phosphocholines													0.118	0.001	2.111
PC(p-16:1/24:4)/PC(o-16:2/24:4)	Phosphocholines													0.100	0.009	1.919
PC(p-18:1/26:4)/PC(o-18:2/26:4)	Phosphocholines													0.120	0.002	2.178
PC(p-18:4/24:0)/PC(o-18:5/24:0)	Phosphocholines	-0.107	0.038	1.850	-0.107	0.020	0.490	-0.112	0.019	0.533				0.169	<0.001	2.894
PC(p-22:2/18:5)/PC(o-22:3/18:5)	Phosphocholines				-0.096	0.028	0.345	-0.098	0.033	0.315				0.094	0.017	1.681
PC(p-34:0)/PC(o-34:1)	Phosphocholines				-0.090	0.021	0.568	-0.092	0.025	0.489				0.132	<0.001	3.667
PC(p-34:1)/PC(o-34:2) B	Phosphocholines	-0.130	0.004	0.863	-0.145	<0.001	1.777	-0.144	<0.001	1.522				0.259	<0.001	8.433
PC(p-36:1)/PC(o-36:2) B	Phosphocholines	-0.123	0.006	1.641	-0.104	0.013	1.043	-0.102	0.020	0.875				0.226	<0.001	6.060
PC(p-36:2)/PC(o-36:3)	Phosphocholines													0.092	0.021	1.396
PC(p-38:3)/PC(o-38:4) B	Phosphocholines													0.089	0.023	1.836
PC(p-38:4)/PC(o-38:5) A	Phosphocholines													0.090	0.049	1.432
PC(p-38:5)/PC(o-38:6) B	Phosphocholines	-0.104	0.048	1.286	-0.096	0.045	0.513	-0.103	0.036	0.577				0.106	0.011	1.451
PC(p-40:3)/PC(o-40:4)	Phosphocholines	-0.117	0.010	2.018	-0.089	0.041	0.488	-0.094	0.036	0.483				0.120	0.001	2.897
PC(p-40:4)/PC(o-40:5)	Phosphocholines	-0.107	0.022	2.358				-0.092	0.047	0.675				0.121	0.001	2.854
PC(p-42:3)/PC(o-42:4)	Phosphocholines													0.090	0.016	2.762
PC(p-42:4)/PC(o-42:5)	Phosphocholines	-0.099	0.048	2.214	-0.106	0.015	0.971	-0.107	0.019	0.985				0.163	<0.001	4.176
PC(p-42:5)/PC(o-42:6) B	Phosphocholines													0.109	0.002	3.404
PC(p-44:4)/PC(o-44:5)	Phosphocholines													0.107	0.004	2.478
PC(p-44:5)/PC(o-44:6)	Phosphocholines													0.087	0.013	3.007
PE(16:0/20:5)	Phosphoethanolamines										-0.104	0.004	0.048
PE(18:0/20:3)	Phosphoethanolamines				0.089	0.020	1.696	0.086	0.035	1.673				-0.109	0.001	3.134
PE(18:0/22:5) A	Phosphoethanolamines													-0.094	0.009	1.286
PE(18:0/22:5) B	Phosphoethanolamines	0.100	0.015	2.882										-0.075	0.034	1.741
PE(18:2/18:2)	Phosphoethanolamines				0.104	0.042	0.751	0.109	0.041	0.782
PE(34:1)	Phosphoethanolamines				0.088	0.030	1.595	0.091	0.033	1.774
PE(34:2) B	Phosphoethanolamines				0.084	0.026	1.683							-0.085	0.013	1.764
PE(36:1) A	Phosphoethanolamines				0.142	<0.001	0.715	0.135	<0.001	0.658	0.118	<0.001	0.494	-0.146	<0.001	1.662
PE(36:1) B	Phosphoethanolamines	0.097	0.035	1.630
PE(36:2)	Phosphoethanolamines				0.113	0.001	2.025	0.103	0.006	2.009	0.102	0.003	0.905	-0.136	<0.001	3.001
PE(36:3)	Phosphoethanolamines				0.124	<0.001	1.386	0.119	0.001	1.446	0.091	0.013	0.482	-0.119	<0.001	1.192
PE(p-36:4)/PE(o-36:5) A	Phosphoethanolamines													-0.103	0.010	0.142
PE(p-40:6)/PE(o-40:7)	Phosphoethanolamines													-0.085	0.022	0.143
PG(18:0/18:2)	Phosphoglycerols				0.094	0.013	1.216	0.086	0.037	1.193	0.088	0.020	0.476	-0.125	<0.001	2.506
PI(16:0/16:0)	Phosphoinositols													-0.077	0.028	0.155
PI(16:0/16:1)	Phosphoinositols	0.119	0.002	1.940
PI(16:0/18:2)	Phosphoinositols	0.103	0.019	1.390	0.138	<0.001	2.976	0.139	<0.001	3.023	0.085	0.040	0.797	-0.194	<0.001	2.897
PI(16:0/20:4)	Phosphoinositols													-0.103	0.006	0.971
PI(17:0/18:2)	Phosphoinositols				0.121	0.003	1.085	0.112	0.010	1.038	0.105	0.010	0.498	-0.145	<0.001	0.724
PS(18:0/20:4)	Phosphoserines	0.099	0.016	2.086
SM(d15:0/16:1)	Sphingomyelins	-0.087	0.048	0.481
SM(d17:0/18:2) A	Sphingomyelins	-0.115	0.010	1.260
SM(d17:0/18:2) B	Sphingomyelins	-0.109	0.007	1.341
SM(d33:1) A	Sphingomyelins	-0.104	0.022	0.469
SM(d33:1) B	Sphingomyelins	-0.118	0.006	1.013
SM(d37:1) B	Sphingomyelins	-0.124	0.003	0.994
SM(d38:2) A	Sphingomyelins	-0.148	0.001	1.812
SM(d38:2) B	Sphingomyelins	-0.100	0.014	1.985
SM(d40:2) B	Sphingomyelins	-0.110	0.007	2.094
SM(d40:2) C	Sphingomyelins	-0.134	0.004	0.964										0.106	0.007	0.581
SM(d41:2)	Sphingomyelins	-0.090	0.048	1.014
SM(d41:2) B	Sphingomyelins	-0.110	0.007	0.920										0.105	0.002	0.089
SM(d42:2)	Sphingomyelins													0.121	0.007	0.548
SM(d42:3) A	Sphingomyelins													0.159	<0.001	1.668
SM(d42:3) B	Sphingomyelins													0.147	<0.001	2.737
TG(40:0)	Triacylglycerols										0.100	0.003	0.233	-0.097	0.003	0.339
TG(42:0)	Triacylglycerols				0.109	0.002	0.423	0.101	0.007	0.365	0.113	0.001	0.544	-0.142	<0.001	1.136
TG(42:1)	Triacylglycerols				0.120	0.001	0.739	0.116	0.003	0.664	0.098	0.010	0.604	-0.140	<0.001	1.465
TG(42:2)	Triacylglycerols				0.102	0.003	0.449	0.093	0.012	0.389	0.112	<0.001	0.557	-0.126	<0.001	0.987
TG(44:0)	Triacylglycerols				0.132	<0.001	1.206	0.127	<0.001	1.141	0.111	0.001	0.727	-0.174	<0.001	2.558
TG(44:1)	Triacylglycerols				0.136	<0.001	1.148	0.130	<0.001	1.068	0.115	0.001	0.778	-0.168	<0.001	2.279
TG(45:0)/TG(14:0/15:0/16:0)	Triacylglycerols				0.192	<0.001	1.387	0.182	<0.001	1.269	0.161	<0.001	1.087	-0.243	<0.001	2.854
TG(46:0)	Triacylglycerols				0.179	<0.001	2.356	0.170	<0.001	2.209	0.152	<0.001	1.367	-0.210	<0.001	4.064
TG(46:1)	Triacylglycerols				0.118	0.001	1.374	0.117	0.002	1.343	0.082	0.035	0.619	-0.168	<0.001	3.178
TG(46:2)	Triacylglycerols				0.122	<0.001	1.151	0.118	0.001	1.067	0.101	0.004	0.703	-0.178	<0.001	2.879
TG(46:3) A	Triacylglycerols				0.184	<0.001	1.578	0.176	<0.001	1.428	0.156	<0.001	1.067	-0.229	<0.001	3.331
TG(46:4) A	Triacylglycerols				0.209	<0.001	1.193	0.197	<0.001	1.030	0.185	<0.001	1.274	-0.230	<0.001	2.385
TG(47:0)/TG(14:0/16:0/17:0)	Triacylglycerols				0.205	<0.001	2.418	0.187	<0.001	2.079	0.198	<0.001	2.246	-0.250	<0.001	4.598
TG(47:1)	Triacylglycerols				0.148	<0.001	1.645	0.138	0.001	1.484	0.129	0.001	1.206	-0.220	<0.001	4.063
TG(47:1)/TG(14:0/15:0/18:1)	Triacylglycerols				0.150	<0.001	1.791	0.140	0.001	1.615	0.132	<0.001	1.366	-0.217	<0.001	4.284
TG(47:2)/TG(14:0/15:0/18:2)	Triacylglycerols				0.134	<0.001	1.495	0.124	0.001	1.327	0.121	0.001	1.177	-0.206	<0.001	4.204
TG(48:1)	Triacylglycerols				0.129	<0.001	1.729	0.126	0.001	1.662	0.097	0.009	0.931	-0.197	<0.001	4.467
TG(48:2)	Triacylglycerols				0.122	0.001	1.671	0.118	0.002	1.571	0.090	0.020	0.906	-0.186	<0.001	4.500
TG(48:3)	Triacylglycerols				0.111	0.002	1.309	0.105	0.006	1.164	0.100	0.005	0.896	-0.176	<0.001	3.847
TG(48:4) A	Triacylglycerols				0.086	0.017	0.858	0.080	0.041	0.700	0.080	0.027	0.749	-0.139	<0.001	2.376
TG(48:4) B	Triacylglycerols													-0.111	<0.001	1.522
TG(48:5)	Triacylglycerols				0.087	0.012	0.437	0.079	0.035	0.378	0.085	0.012	0.327	-0.126	<0.001	1.217
TG(49:0)	Triacylglycerols				0.178	<0.001	1.895	0.162	<0.001	1.670	0.186	<0.001	2.030	-0.205	<0.001	3.207
TG(49:1)	Triacylglycerols				0.141	<0.001	1.924	0.128	0.001	1.665	0.129	<0.001	1.797	-0.204	<0.001	4.774
TG(49:2)	Triacylglycerols				0.116	0.002	1.439	0.106	0.010	1.232	0.109	0.004	1.398	-0.192	<0.001	4.455
TG(49:3)	Triacylglycerols				0.109	0.003	1.578	0.099	0.014	1.344	0.099	0.008	1.354	-0.180	<0.001	4.454
TG(50:0)	Triacylglycerols				0.134	<0.001	1.564	0.126	0.001	1.450	0.137	<0.001	1.462	-0.111	0.002	2.041
TG(50:1)	Triacylglycerols				0.162	<0.001	1.743	0.154	<0.001	1.622	0.144	<0.001	1.124	-0.209	<0.001	2.950
TG(50:2)	Triacylglycerols				0.120	0.002	1.862	0.116	0.004	1.681	0.089	0.029	1.381	-0.181	<0.001	5.480
TG(50:3) A	Triacylglycerols				0.103	0.007	1.769	0.098	0.017	1.549	0.081	0.049	1.341	-0.151	<0.001	4.774
TG(50:4)	Triacylglycerols				0.116	0.001	1.708	0.105	0.005	1.425	0.111	0.001	1.344	-0.167	<0.001	4.378
TG(50:5)	Triacylglycerols				0.163	<0.001	1.937	0.150	<0.001	1.640	0.144	<0.001	1.364	-0.205	<0.001	3.998
TG(51:0)/TG(16:0/17:0/18:0)	Triacylglycerols				0.142	<0.001	1.056	0.127	0.001	0.904	0.162	<0.001	1.515	-0.175	<0.001	2.217
TG(51:1)	Triacylglycerols				0.134	<0.001	1.821	0.121	0.002	1.575	0.130	<0.001	2.010	-0.180	<0.001	4.123
TG(51:2)	Triacylglycerols				0.099	0.015	1.431				0.092	0.024	1.651	-0.160	<0.001	4.481
TG(51:3)	Triacylglycerols										0.080	0.040	1.615	-0.140	<0.001	4.385
TG(51:4)	Triacylglycerols				0.101	0.007	1.306	0.083	0.045	0.993	0.112	0.001	1.531	-0.155	<0.001	3.645
TG(51:5)	Triacylglycerols				0.146	<0.001	1.430	0.132	<0.001	1.137	0.130	<0.001	1.381	-0.181	<0.001	2.986
TG(52:0)	Triacylglycerols				0.086	0.030	0.682				0.118	0.001	1.146	-0.073	0.048	0.734
TG(52:1)	Triacylglycerols				0.178	<0.001	2.940	0.170	<0.001	2.606	0.148	<0.001	2.681	-0.201	<0.001	5.643
TG(52:4)	Triacylglycerols													-0.102	0.003	4.164
TG(52:4)/TG(16:1/18:1/18:2)	Triacylglycerols				0.116	0.001	1.443	0.104	0.007	1.214	0.098	0.007	1.133	-0.124	<0.001	2.826
TG(52:5)	Triacylglycerols				0.132	<0.001	2.016	0.120	0.001	1.653	0.111	0.001	1.546	-0.144	<0.001	4.058
TG(52:6)	Triacylglycerols				0.163	<0.001	1.726	0.154	<0.001	1.448	0.125	<0.001	1.065	-0.160	<0.001	3.037
TG(52:6)/TG(16:1/18:2/18:3)	Triacylglycerols				0.157	<0.001	1.789	0.145	<0.001	1.458	0.132	<0.001	1.295	-0.147	<0.001	2.907
TG(53:1)	Triacylglycerols				0.124	0.001	1.184	0.113	0.006	0.988	0.134	<0.001	1.803	-0.165	<0.001	2.966
TG(53:2)	Triacylglycerols													-0.136	<0.001	3.448
TG(53:3)	Triacylglycerols													-0.135	<0.001	3.678
TG(53:3)/TG(17:0/18:1/18:2)	Triacylglycerols				0.088	0.023	1.297				0.093	0.012	1.518	-0.141	<0.001	3.634
TG(53:4)	Triacylglycerols										0.079	0.046	1.570	-0.134	<0.001	3.643
TG(53:5)	Triacylglycerols				0.109	0.002	1.473	0.095	0.015	1.193	0.109	0.001	1.352	-0.144	<0.001	3.140
TG(53:5)/TG(16:0/17:1/20:4)	Triacylglycerols				0.154	<0.001	1.346	0.145	<0.001	0.998	0.125	<0.001	1.751	-0.176	<0.001	2.423
TG(54:1)	Triacylglycerols				0.164	<0.001	2.060	0.154	<0.001	1.758	0.183	<0.001	3.501	-0.186	<0.001	4.138
TG(54:2)	Triacylglycerols				0.166	<0.001	2.616	0.159	<0.001	2.245	0.101	0.011	2.625	-0.217	<0.001	6.156
TG(54:3)	Triacylglycerols				0.106	0.012	1.519	0.103	0.022	1.256				-0.129	0.001	3.500
TG(54:4)	Triacylglycerols				0.102	0.011	1.187	0.098	0.021	0.928				-0.107	0.003	2.555
TG(54:5) A	Triacylglycerols				0.151	<0.001	1.773	0.148	<0.001	1.489				-0.141	<0.001	2.826
TG(54:5) B	Triacylglycerols				0.092	0.018	1.223	0.093	0.023	1.105				-0.086	0.017	2.282
TG(54:6) A	Triacylglycerols				0.205	<0.001	2.209	0.200	<0.001	1.893				-0.174	<0.001	3.001
TG(54:6) C	Triacylglycerols				0.159	<0.001	2.037	0.157	<0.001	1.846	0.117	0.001	1.561	-0.184	<0.001	3.945
TG(54:7) A	Triacylglycerols				0.210	<0.001	1.467	0.201	<0.001	1.224	0.156	<0.001	0.956	-0.144	<0.001	1.544
TG(54:7)/TG(16:0/16:1/22:6)	Triacylglycerols				0.134	<0.001	2.140	0.133	0.001	1.883	0.098	0.012	1.323	-0.143	<0.001	3.197
TG(54:7)/TG(16:0/18:2/20:5)	Triacylglycerols				0.115	0.002	1.636	0.112	0.004	1.432	0.088	0.026	1.016	-0.136	<0.001	2.997
TG(55:1)	Triacylglycerols				0.211	<0.001	3.008	0.195	<0.001	2.497	0.198	<0.001	4.065	-0.268	<0.001	5.869
TG(55:3)	Triacylglycerols				0.086	0.030	1.193							-0.131	<0.001	3.097
TG(55:4)/TG(18:1/18:2/19:1)	Triacylglycerols				0.101	0.009	1.784	0.089	0.034	1.519	0.088	0.027	1.990	-0.145	<0.001	2.780
TG(55:5)/TG(17:0/18:1/20:4)	Triacylglycerols										0.087	0.031	0.905	-0.144	<0.001	1.889
TG(56:1)	Triacylglycerols	0.114	0.007	1.234	0.189	<0.001	2.319	0.182	<0.001	1.986				-0.230	<0.001	4.499
TG(56:2)	Triacylglycerols	0.113	0.006	1.637	0.178	<0.001	2.493	0.172	<0.001	2.160				-0.211	<0.001	4.997
TG(56:3)	Triacylglycerols	0.133	0.001	2.122	0.144	<0.001	2.438	0.142	<0.001	2.138	-0.132	<0.001	0.670	-0.188	<0.001	5.166
TG(56:4)	Triacylglycerols				0.117	0.002	1.961	0.114	0.005	1.601				-0.141	<0.001	3.249
TG(56:7) A	Triacylglycerols													-0.076	0.046	1.698
TG(56:8) A	Triacylglycerols				0.127	<0.001	1.286	0.123	0.001	1.089	0.087	0.018	1.165	-0.123	<0.001	1.209
TG(56:8) B	Triacylglycerols													-0.097	0.004	2.715
TG(56:9)	Triacylglycerols				0.099	0.005	0.758	0.099	0.008	0.658				-0.081	0.017	0.169
TG(57:1)	Triacylglycerols				0.209	<0.001	2.675	0.195	<0.001	2.229	0.170	<0.001	3.839	-0.238	<0.001	5.001
TG(58:1)	Triacylglycerols	0.129	0.002	1.277							-0.279	<0.001	0.001	-0.122	<0.001	2.408
TG(58:10)	Triacylglycerols				0.094	0.012	0.579	0.095	0.016	0.556				-0.088	0.011	0.108
TG(58:2)	Triacylglycerols	0.126	0.001	1.173	0.078	0.041	0.929	0.079	0.047	0.803	-0.304	<0.001	0.261	-0.101	0.002	2.022
TG(58:3)	Triacylglycerols	0.113	0.004	0.612	0.158	<0.001	1.581	0.153	<0.001	1.320				-0.189	<0.001	2.847
TG(58:6)	Triacylglycerols													-0.090	0.011	2.981
TG(58:7)/TG(18:1/18:1/22:5)	Triacylglycerols													-0.076	0.045	1.054
TG(58:7)/TG(18:1/18:2/22:4)	Triacylglycerols													-0.083	0.024	2.351
TG(60:2)	Triacylglycerols	0.109	0.006	0.585							-0.350	<0.001	0.206
Unknown_1001	Unknown	0.108	0.020	1.393										-0.086	0.030	0.700
Unknown_1003	Unknown	0.116	0.006	0.263
Unknown_1007	Unknown													-0.116	0.004	0.408
Unknown_1008	Unknown				0.148	<0.001	1.931	0.144	<0.001	2.068	0.106	0.003	0.537	-0.114	0.001	1.943
Unknown_1009	Unknown													-0.114	0.005	2.276
Unknown_1011	Unknown				0.111	0.033	0.521							-0.151	0.001	1.590
Unknown_1012	Unknown	-0.122	0.010	0.554
Unknown_1013	Unknown	-0.102	0.010	0.998										0.070	0.044	1.397
Unknown_102	Unknown	-0.108	0.023	0.748										0.088	0.029	0.162
Unknown_1020	Unknown										0.074	0.045	0.379
Unknown_1025	Unknown							0.084	0.040	0.338				-0.099	0.004	0.000
Unknown_1027	Unknown													0.115	0.002	2.336
Unknown_1028	Unknown	-0.099	0.028	0.200
Unknown_1038	Unknown													-0.076	0.037	0.106
Unknown_104	Unknown													0.088	0.026	0.204
Unknown_1044	Unknown	0.100	0.035	0.781
Unknown_1046	Unknown				0.104	0.006	1.260	0.096	0.019	1.281	0.083	0.040	0.558	-0.112	0.001	1.337
Unknown_1051	Unknown	0.110	0.005	1.602
Unknown_1062	Unknown													0.083	0.020	0.631
Unknown_1063	Unknown										0.090	0.024	0.014
Unknown_1065	Unknown	0.111	0.010	0.004
Unknown_107	Unknown													-0.097	0.010	0.913
Unknown_1071	Unknown	0.106	0.038	0.001
Unknown_1078	Unknown				0.180	<0.001	2.906	0.172	<0.001	2.885	0.139	<0.001	1.423	-0.189	<0.001	3.373
Unknown_1079	Unknown													0.089	0.008	0.016
Unknown_108	Unknown													0.131	<0.001	1.398
Unknown_1082	Unknown				0.099	0.022	0.960	0.095	0.040	0.835				-0.171	<0.001	3.660
Unknown_1083	Unknown				0.115	0.007	0.965	0.110	0.017	0.834				-0.178	<0.001	3.801
Unknown_1085	Unknown				0.103	0.015	0.917	0.103	0.021	0.937				-0.181	<0.001	3.276
Unknown_1086	Unknown				0.095	0.008	0.606	0.089	0.022	0.542				-0.082	0.015	1.383
Unknown_1087	Unknown													-0.159	<0.001	2.396
Unknown_1088	Unknown				0.103	0.005	0.885	0.101	0.009	0.727				-0.102	0.002	1.806
Unknown_1095	Unknown				-0.086	0.039	0.798							0.119	0.001	3.187
Unknown_1096	Unknown	-0.108	0.020	1.258										0.104	0.006	1.800
Unknown_1099	Unknown													-0.084	0.040	0.360
Unknown_110	Unknown	0.104	0.017	2.332
Unknown_1100	Unknown	0.100	0.022	1.592
Unknown_1105	Unknown													-0.102	0.006	1.267
Unknown_1109	Unknown													-0.088	0.025	0.918
Unknown_1112	Unknown													0.154	<0.001	1.089
Unknown_1114	Unknown													0.136	0.001	1.721
Unknown_1116	Unknown	-0.132	0.004	0.758
Unknown_1117	Unknown	-0.106	0.015	1.769
Unknown_1120	Unknown	0.143	0.001	2.171										-0.091	0.016	0.175
Unknown_1122	Unknown	0.112	0.021	1.867										-0.098	0.016	0.324
Unknown_1123	Unknown	0.124	0.007	1.711				0.096	0.037	0.575				-0.083	0.041	0.247
Unknown_1124	Unknown													-0.105	0.002	1.732
Unknown_1125	Unknown	0.171	0.001	2.086										-0.097	0.020	0.178
Unknown_1128	Unknown													-0.136	<0.001	1.525
Unknown_1129	Unknown													-0.073	0.044	1.965
Unknown_1132	Unknown	0.103	0.017	2.809	0.195	<0.001	2.950	0.190	<0.001	2.967	0.151	<0.001	1.438	-0.213	<0.001	3.156
Unknown_1133	Unknown	0.105	0.015	3.021	0.200	<0.001	2.957	0.197	<0.001	3.019	0.148	<0.001	1.467	-0.212	<0.001	3.194
Unknown_1136	Unknown				-0.107	0.005	0.004	-0.110	0.005	0.011
Unknown_1141	Unknown													0.089	0.016	2.189
Unknown_1143	Unknown													0.122	0.001	2.134
Unknown_1146	Unknown													0.127	0.004	2.459
Unknown_1147	Unknown				-0.097	0.007	0.533	-0.102	0.006	0.887	-0.079	0.037	0.023
Unknown_1148	Unknown													-0.079	0.020	1.403
Unknown_1151	Unknown	-0.097	0.033	1.108
Unknown_1155	Unknown	-0.102	0.029	1.167	-0.129	0.001	1.686	-0.130	0.001	1.460				0.191	<0.001	7.125
Unknown_1156	Unknown	-0.094	0.050	0.717
Unknown_1161	Unknown	0.108	0.015	2.175
Unknown_1165	Unknown													0.118	0.001	2.045
Unknown_1170	Unknown													0.121	0.001	4.051
Unknown_1186	Unknown													-0.092	0.018	1.229
Unknown_1196	Unknown													-0.079	0.037	0.853
Unknown_1197	Unknown													0.142	<0.001	3.120
Unknown_12	Unknown				0.137	0.001	0.425	0.145	0.001	0.504				-0.124	0.003	0.421
Unknown_1207	Unknown	0.089	0.025	2.733
Unknown_1210	Unknown				-0.092	0.013	1.717	-0.100	0.009	2.557	-0.094	0.010	0.103
Unknown_1212	Unknown													-0.072	0.043	3.456
Unknown_1217	Unknown										0.111	0.001	0.272
Unknown_122	Unknown													0.093	0.010	0.346
Unknown_127	Unknown				-0.124	0.002	1.252	-0.115	0.008	1.042	-0.096	0.026	0.443	0.217	<0.001	2.747
Unknown_135	Unknown	0.154	0.002	1.369										-0.115	0.005	1.690
Unknown_144	Unknown	-0.154	0.007	0.463
Unknown_157	Unknown	-0.131	0.003	1.230
Unknown_158	Unknown										-0.077	0.038	0.049
Unknown_166	Unknown				0.088	0.023	0.635	0.085	0.040	0.550				-0.088	0.013	0.380
Unknown_168	Unknown				0.078	0.045	0.285
Unknown_174	Unknown	-0.132	0.001	1.779
Unknown_178	Unknown	0.112	0.023	1.602
Unknown_180	Unknown	0.110	0.040	1.891
Unknown_193	Unknown	-0.103	0.025	0.663
Unknown_195	Unknown	-0.098	0.030	1.448										0.085	0.026	0.812
Unknown_196	Unknown													-0.102	0.006	0.088
Unknown_198	Unknown													0.090	0.040	0.488
Unknown_199	Unknown													0.115	0.002	0.843
Unknown_202	Unknown	0.115	0.040	1.019	0.102	0.048	0.822	0.109	0.041	0.911				-0.111	0.015	0.751
Unknown_203	Unknown	0.127	0.017	0.782										-0.096	0.035	0.340
Unknown_209	Unknown													-0.130	<0.001	0.181
Unknown_210	Unknown							-0.089	0.047	0.021
Unknown_211	Unknown	-0.119	0.042	0.744
Unknown_212	Unknown	-0.095	0.030	0.725
Unknown_214	Unknown	0.106	0.009	0.128	0.118	0.001	0.156	0.136	<0.001	0.230				-0.078	0.026	0.093
Unknown_216	Unknown													0.135	0.001	1.544
Unknown_221	Unknown													-0.145	<0.001	2.610
Unknown_222	Unknown				0.082	0.042	1.137							-0.142	<0.001	2.599
Unknown_223	Unknown				0.109	0.023	1.219				0.106	0.027	0.826	-0.193	<0.001	3.712
Unknown_224	Unknown													-0.128	0.001	2.369
Unknown_225	Unknown													-0.097	0.027	1.306
Unknown_226	Unknown													-0.099	0.005	1.809
Unknown_242	Unknown	-0.114	0.014	1.290	-0.104	0.013	0.165	-0.114	0.008	0.211				0.161	<0.001	1.717
Unknown_243	Unknown													0.153	<0.001	1.937
Unknown_244	Unknown													0.124	0.001	1.161
Unknown_248	Unknown	0.100	0.035	1.042
Unknown_249	Unknown	0.125	0.017	1.442	0.108	0.024	0.522	0.116	0.020	0.636				-0.112	0.010	0.387
Unknown_250	Unknown	0.112	0.048	1.037
Unknown_252	Unknown													-0.086	0.025	0.161
Unknown_253	Unknown				-0.087	0.042	0.024	-0.089	0.044	0.024				0.123	0.001	0.823
Unknown_258	Unknown													0.116	0.004	1.259
Unknown_259	Unknown	-0.134	0.004	2.287										0.092	0.021	2.055
Unknown_260	Unknown	-0.131	0.015	1.061
Unknown_261	Unknown													0.111	0.010	0.612
Unknown_262	Unknown													0.099	0.043	0.308
Unknown_280	Unknown	0.128	0.002	1.925										-0.119	<0.001	3.144
Unknown_281	Unknown				-0.080	0.046	0.096							0.075	0.041	0.001
Unknown_285	Unknown													0.091	0.004	0.041
Unknown_287	Unknown	0.100	0.018	1.768										-0.083	0.019	2.337
Unknown_292	Unknown				0.127	<0.001	1.696	0.118	0.002	1.395	0.110	0.002	1.278	-0.125	<0.001	2.996
Unknown_299	Unknown				0.120	0.002	1.321	0.114	0.005	1.166	0.107	0.005	1.093	-0.162	<0.001	2.686
Unknown_300	Unknown				0.095	0.013	0.913	0.092	0.024	0.815				-0.122	<0.001	2.356
Unknown_301	Unknown				0.118	<0.001	1.362	0.117	0.001	1.160	0.078	0.037	0.918	-0.138	<0.001	1.764
Unknown_302	Unknown				0.166	<0.001	2.748	0.156	<0.001	2.304	0.151	<0.001	2.308	-0.218	<0.001	6.129
Unknown_303	Unknown				0.103	0.011	1.275	0.099	0.021	1.115				-0.135	<0.001	3.501
Unknown_306	Unknown				0.117	0.005	1.956	0.108	0.019	1.622	0.095	0.031	1.444	-0.135	<0.001	3.973
Unknown_307	Unknown				0.114	0.016	1.566	0.110	0.029	1.410				-0.128	0.002	3.404
Unknown_308	Unknown				0.196	<0.001	2.638	0.192	<0.001	2.297				-0.180	<0.001	3.536
Unknown_309	Unknown				0.161	<0.001	1.834	0.163	<0.001	1.755				-0.162	<0.001	2.854
Unknown_314	Unknown				0.135	0.001	1.870	0.139	0.001	1.700				-0.113	0.004	2.228
Unknown_315	Unknown				0.129	0.002	1.615	0.128	0.003	1.516				-0.127	0.001	2.308
Unknown_319	Unknown				0.146	<0.001	1.937	0.142	<0.001	1.796	0.113	0.004	1.150	-0.210	<0.001	4.819
Unknown_32	Unknown													0.124	0.001	2.396
Unknown_320	Unknown													-0.127	<0.001	2.378
Unknown_321	Unknown				0.133	0.001	1.742	0.127	0.002	1.574	0.099	0.014	1.127	-0.198	<0.001	4.758
Unknown_322	Unknown				0.128	0.001	2.264	0.122	0.002	1.967	0.098	0.012	1.833	-0.199	<0.001	6.571
Unknown_323	Unknown				0.104	0.009	1.723	0.101	0.019	1.546				-0.158	<0.001	4.588
Unknown_324	Unknown													-0.117	0.001	4.190
Unknown_326	Unknown													-0.104	0.003	4.003
Unknown_328	Unknown													-0.108	0.004	4.216
Unknown_330	Unknown				0.157	<0.001	2.028	0.151	<0.001	1.654	0.082	0.043	1.852	-0.155	<0.001	3.523
Unknown_331	Unknown				0.092	0.017	1.559				0.092	0.015	1.461	-0.125	<0.001	4.119
Unknown_332	Unknown				0.099	0.013	1.646	0.091	0.035	1.352				-0.150	<0.001	4.961
Unknown_334	Unknown				0.130	<0.001	2.054	0.120	0.002	1.672	0.093	0.018	1.772	-0.158	<0.001	4.439
Unknown_335	Unknown													-0.075	0.038	1.870
Unknown_336	Unknown													0.064	0.047	2.215
Unknown_339	Unknown				0.134	0.001	1.387	0.134	0.001	1.187				-0.117	0.002	2.107
Unknown_340	Unknown				0.133	0.001	1.095	0.136	0.001	1.007				-0.097	0.014	1.811
Unknown_343	Unknown				-0.091	0.020	0.921	-0.086	0.041	0.770				0.123	<0.001	1.864
Unknown_349	Unknown				0.138	<0.001	2.062	0.123	0.001	1.567	0.123	<0.001	2.665	-0.193	<0.001	3.544
Unknown_351	Unknown				-0.082	0.030	0.148	-0.084	0.036	0.171				0.096	0.004	1.115
Unknown_353	Unknown				0.142	<0.001	0.446	0.139	<0.001	0.462	0.103	0.004	0.178	-0.147	<0.001	0.942
Unknown_354	Unknown				-0.132	0.002	0.744	-0.135	0.002	0.777				0.136	<0.001	1.175
Unknown_359	Unknown													0.097	0.037	0.531
Unknown_360	Unknown				-0.096	0.039	0.444	-0.110	0.019	0.521				0.087	0.040	0.660
Unknown_361	Unknown													0.078	0.048	0.419
Unknown_362	Unknown	-0.095	0.031	0.980	-0.135	<0.001	0.590	-0.135	<0.001	0.558	-0.098	0.010	0.914	0.163	<0.001	1.470
Unknown_364	Unknown	0.099	0.027	2.011	0.175	<0.001	2.545	0.176	<0.001	2.429	0.123	0.001	1.625	-0.224	<0.001	5.641
Unknown_365	Unknown				0.180	<0.001	2.436	0.169	<0.001	2.217	0.154	<0.001	1.587	-0.239	<0.001	5.493
Unknown_366	Unknown				-0.099	0.026	0.348	-0.100	0.034	0.322				0.098	0.015	1.321
Unknown_367	Unknown				0.105	0.006	1.556	0.104	0.010	1.463				-0.163	<0.001	4.539
Unknown_368	Unknown													-0.093	0.023	2.242
Unknown_369	Unknown													-0.119	0.001	2.399
Unknown_370	Unknown													-0.169	<0.001	6.310
Unknown_372	Unknown													-0.124	0.001	4.452
Unknown_373	Unknown													-0.102	0.040	2.981
Unknown_377	Unknown				-0.117	0.026	0.744	-0.112	0.046	0.677
Unknown_378	Unknown				0.098	0.027	1.087	0.094	0.048	0.838
Unknown_379	Unknown				0.135	0.001	1.621	0.143	0.001	1.553				-0.107	0.006	2.945
Unknown_381	Unknown				0.124	0.005	0.539	0.129	0.005	0.502				-0.089	0.040	0.931
Unknown_382	Unknown				0.122	0.003	1.257	0.116	0.007	0.981				-0.110	0.004	2.039
Unknown_383	Unknown				0.100	0.017	1.466	0.093	0.039	1.177				-0.131	<0.001	3.065
Unknown_384	Unknown													-0.108	0.009	2.427
Unknown_385	Unknown													-0.112	0.004	3.091
Unknown_390	Unknown				0.135	<0.001	1.765	0.128	0.001	1.385	0.097	0.013	2.260	-0.195	<0.001	4.345
Unknown_391	Unknown				0.185	<0.001	2.493	0.172	<0.001	2.308	0.183	<0.001	1.936	-0.195	<0.001	3.065
Unknown_392	Unknown													-0.085	0.017	1.356
Unknown_393	Unknown				0.171	<0.001	2.719	0.157	<0.001	2.386	0.165	<0.001	2.165	-0.202	<0.001	5.079
Unknown_394	Unknown													-0.128	0.003	1.318
Unknown_395	Unknown													-0.149	<0.001	5.180
Unknown_398	Unknown													0.099	0.013	0.016
Unknown_399	Unknown													-0.108	0.007	3.942
Unknown_401	Unknown				-0.130	<0.001	1.272	-0.118	0.003	0.991	-0.118	0.001	2.017	0.157	<0.001	3.703
Unknown_402	Unknown				-0.159	<0.001	2.146	-0.149	<0.001	1.812	-0.132	<0.001	2.826	0.223	<0.001	5.850
Unknown_403	Unknown				-0.126	0.001	2.115	-0.119	0.002	1.798	-0.092	0.020	2.565	0.171	<0.001	5.491
Unknown_404	Unknown				-0.134	<0.001	1.912	-0.125	0.002	1.658	-0.100	0.010	2.241	0.151	<0.001	5.141
Unknown_405	Unknown				0.111	0.018	0.934	0.114	0.021	0.846
Unknown_406	Unknown				0.152	<0.001	1.481	0.143	0.002	1.109				-0.163	<0.001	2.913
Unknown_407	Unknown				0.106	0.017	0.995	0.097	0.042	0.723				-0.142	<0.001	2.767
Unknown_408	Unknown				0.156	<0.001	1.376	0.146	0.002	1.037				-0.179	<0.001	4.299
Unknown_409	Unknown				0.129	0.001	2.537	0.130	0.002	2.207				-0.140	<0.001	3.349
Unknown_41	Unknown				-0.184	<0.001	0.157	-0.182	<0.001	0.162	-0.159	<0.001	0.306	0.177	<0.001	0.053
Unknown_411	Unknown				0.167	<0.001	2.495	0.154	<0.001	2.201	0.164	<0.001	2.563	-0.165	<0.001	4.108
Unknown_412	Unknown				0.149	<0.001	2.240	0.140	<0.001	1.945	0.112	0.004	2.376	-0.189	<0.001	5.314
Unknown_413	Unknown				0.169	<0.001	2.768	0.157	<0.001	2.400	0.167	<0.001	2.794	-0.214	<0.001	5.883
Unknown_414	Unknown				0.205	<0.001	3.181	0.194	<0.001	2.813	0.193	<0.001	2.946	-0.272	<0.001	7.104
Unknown_415	Unknown	0.148	0.009	2.365	0.163	0.001	1.989	0.163	0.001	1.822				-0.223	<0.001	5.186
Unknown_416	Unknown				0.146	0.001	2.208	0.138	0.004	1.862				-0.216	<0.001	5.769
Unknown_417	Unknown	0.129	0.004	1.496	0.152	<0.001	2.672	0.152	<0.001	2.326	-0.135	<0.001	0.741	-0.159	<0.001	3.989
Unknown_419	Unknown													-0.112	0.002	0.681
Unknown_420	Unknown				0.111	0.009	1.053	0.105	0.021	0.947	0.145	<0.001	1.659	-0.096	0.016	1.103
Unknown_421	Unknown				0.221	<0.001	3.191	0.215	<0.001	2.852	0.211	<0.001	4.188	-0.258	<0.001	5.935
Unknown_422	Unknown				0.224	<0.001	3.202	0.221	<0.001	2.913	0.208	<0.001	4.084	-0.245	<0.001	5.614
Unknown_423	Unknown													-0.095	0.012	0.298
Unknown_428	Unknown	0.125	0.003	2.660										-0.074	0.044	2.706
Unknown_429	Unknown													0.095	0.020	0.722
Unknown_432	Unknown													-0.095	0.011	0.716
Unknown_437	Unknown													-0.094	0.010	3.386
Unknown_442	Unknown													0.076	0.025	0.269
Unknown_45	Unknown				-0.180	<0.001	0.022	-0.175	<0.001	0.023	-0.147	<0.001	0.041	0.204	<0.001	0.021
Unknown_453	Unknown													-0.077	0.039	1.665
Unknown_461	Unknown													-0.074	0.040	1.185
Unknown_463	Unknown													-0.087	0.010	1.167
Unknown_464	Unknown													-0.072	0.033	1.634
Unknown_465	Unknown													-0.098	0.011	0.582
Unknown_477	Unknown										-0.085	0.050	0.019
Unknown_479	Unknown													0.102	0.019	0.828
Unknown_484	Unknown	0.117	0.006	3.000
Unknown_487	Unknown													-0.097	0.006	0.600
Unknown_492	Unknown													-0.098	0.009	2.488
Unknown_493	Unknown													-0.083	0.026	1.656
Unknown_497	Unknown													-0.073	0.047	0.601
Unknown_502	Unknown													-0.094	0.009	1.238
Unknown_506	Unknown	0.091	0.023	0.436										-0.116	<0.001	0.521
Unknown_519	Unknown	0.089	0.033	0.786										-0.087	0.010	1.278
Unknown_52	Unknown													-0.094	0.014	0.989
Unknown_526	Unknown													-0.088	0.010	0.492
Unknown_527	Unknown				0.094	0.013	0.439	0.089	0.031	0.344	0.084	0.031	0.377	-0.121	<0.001	0.449
Unknown_528	Unknown				0.090	0.029	0.749	0.094	0.029	0.716				-0.114	0.002	0.783
Unknown_546	Unknown				0.117	0.001	0.448	0.113	0.004	0.411	0.102	0.005	0.338	-0.104	0.003	1.327
Unknown_550	Unknown													-0.126	0.002	0.430
Unknown_552	Unknown													-0.092	0.016	0.558
Unknown_553	Unknown				-0.087	0.035	0.201							0.104	0.004	0.697
Unknown_56	Unknown				0.137	<0.001	2.896	0.137	0.001	2.781				-0.181	<0.001	3.020
Unknown_584	Unknown	0.189	<0.001	0.142	0.122	0.003	0.455	0.143	0.001	0.486				-0.111	0.005	0.143
Unknown_594	Unknown				0.121	0.002	1.167	0.115	0.006	0.913	0.087	0.040	0.722	-0.143	<0.001	2.157
Unknown_599	Unknown	0.151	0.001	1.318										-0.093	0.021	0.446
Unknown_600	Unknown				0.210	<0.001	2.255	0.202	<0.001	1.875	0.150	<0.001	1.497	-0.184	<0.001	1.785
Unknown_606	Unknown	0.166	<0.001	0.364	0.090	0.029	0.062	0.099	0.020	0.089				-0.138	<0.001	0.205
Unknown_609	Unknown				0.096	0.015	0.481	0.094	0.026	0.397				-0.102	0.004	0.582
Unknown_612	Unknown													0.119	0.010	0.443
Unknown_621	Unknown										-0.084	0.046	0.914
Unknown_622	Unknown	0.111	0.020	0.377
Unknown_625	Unknown				-0.150	0.001	0.261	-0.134	0.005	0.224	-0.174	<0.001	0.734	0.168	<0.001	0.143
Unknown_626	Unknown													-0.086	0.009	0.051
Unknown_630	Unknown				-0.143	<0.001	0.202	-0.134	0.001	0.172	-0.142	<0.001	0.612	0.195	<0.001	0.487
Unknown_634	Unknown				-0.165	<0.001	0.203	-0.157	<0.001	0.157	-0.163	<0.001	0.890	0.179	<0.001	0.440
Unknown_635	Unknown				-0.147	<0.001	0.526	-0.145	<0.001	0.454	-0.112	0.003	0.580	0.166	<0.001	0.787
Unknown_654	Unknown				-0.141	<0.001	0.293	-0.139	<0.001	0.248	-0.112	0.003	0.387	0.136	<0.001	0.779
Unknown_658	Unknown													-0.107	0.003	0.804
Unknown_660	Unknown				-0.115	0.006	0.116	-0.115	0.010	0.074	-0.117	0.004	0.676	0.112	0.004	0.264
Unknown_672	Unknown													0.092	0.006	1.483
Unknown_683	Unknown				-0.263	<0.001	1.161	-0.255	<0.001	1.164	-0.234	<0.001	1.388	0.233	<0.001	0.655
Unknown_691	Unknown				-0.139	0.002	0.382	-0.141	0.002	0.374	-0.105	0.027	0.392
Unknown_698	Unknown	-0.125	0.006	0.371							0.145	<0.001	0.521
Unknown_700	Unknown				-0.207	<0.001	0.535	-0.204	<0.001	0.488	-0.187	<0.001	1.095	0.183	<0.001	0.412
Unknown_702	Unknown				-0.179	<0.001	0.832	-0.177	<0.001	0.657	-0.155	<0.001	1.345	0.117	0.004	0.276
Unknown_703	Unknown													0.113	0.004	2.429
Unknown_709	Unknown													0.115	0.004	2.410
Unknown_714	Unknown				-0.174	<0.001	0.026	-0.167	<0.001	0.028	-0.142	<0.001	0.116	0.161	<0.001	0.038
Unknown_715	Unknown				-0.236	<0.001	0.571	-0.224	<0.001	0.555	-0.201	<0.001	0.601	0.206	<0.001	0.534
Unknown_72	Unknown				0.085	0.035	0.164	0.096	0.019	0.234				-0.077	0.037	0.159
Unknown_722	Unknown				-0.271	<0.001	0.996	-0.262	<0.001	0.951	-0.254	<0.001	1.171	0.221	<0.001	0.852
Unknown_723	Unknown				-0.118	0.001	0.018	-0.120	0.001	0.011	-0.099	0.005	0.054	0.119	<0.001	0.033
Unknown_725	Unknown				-0.281	<0.001	1.173	-0.274	<0.001	1.068	-0.256	<0.001	1.588	0.256	<0.001	0.949
Unknown_736	Unknown				-0.307	<0.001	1.197	-0.298	<0.001	1.116	-0.284	<0.001	1.526	0.249	<0.001	0.650
Unknown_739	Unknown				-0.307	<0.001	1.214	-0.298	<0.001	1.135	-0.284	<0.001	1.520	0.247	<0.001	0.668
Unknown_740	Unknown				-0.251	<0.001	0.358	-0.244	<0.001	0.311	-0.208	<0.001	0.548	0.211	<0.001	0.264
Unknown_749	Unknown				-0.149	<0.001	0.004	-0.136	<0.001	0.001	-0.163	<0.001	0.445	0.086	0.010	0.084
Unknown_75	Unknown													0.088	0.010	0.838
Unknown_750	Unknown				-0.243	<0.001	0.547	-0.229	<0.001	0.395	-0.226	<0.001	1.363	0.187	<0.001	0.291
Unknown_751	Unknown				-0.223	<0.001	0.458	-0.209	<0.001	0.323	-0.222	<0.001	1.319	0.156	<0.001	0.106
Unknown_752	Unknown				-0.197	<0.001	0.101	-0.189	<0.001	0.081	-0.178	<0.001	0.447	0.139	<0.001	0.016
Unknown_753	Unknown				-0.210	<0.001	0.403	-0.196	<0.001	0.286	-0.214	<0.001	1.217	0.141	0.001	0.058
Unknown_754	Unknown				-0.203	<0.001	0.341	-0.194	<0.001	0.280	-0.184	<0.001	0.688	0.147	<0.001	0.051
Unknown_756	Unknown				-0.163	<0.001	0.357	-0.158	<0.001	0.330	-0.143	<0.001	0.555	0.120	0.001	0.133
Unknown_758	Unknown				-0.328	<0.001	2.083	-0.313	<0.001	1.752	-0.332	<0.001	3.131	0.307	<0.001	1.929
Unknown_759	Unknown				-0.329	<0.001	2.706	-0.317	<0.001	2.384	-0.303	<0.001	2.904	0.287	<0.001	1.974
Unknown_760	Unknown				-0.336	<0.001	2.514	-0.324	<0.001	2.125	-0.336	<0.001	3.206	0.293	<0.001	2.243
Unknown_761	Unknown				-0.438	<0.001	4.433	-0.424	<0.001	3.968	-0.398	<0.001	4.252	0.318	<0.001	2.133
Unknown_762	Unknown				-0.254	<0.001	0.803	-0.250	<0.001	0.698	-0.219	<0.001	0.928	0.208	<0.001	0.513
Unknown_763	Unknown				-0.342	<0.001	2.080	-0.331	<0.001	1.842	-0.317	<0.001	2.281	0.299	<0.001	1.663
Unknown_764	Unknown				-0.293	<0.001	1.399	-0.279	<0.001	1.125	-0.279	<0.001	1.722	0.269	<0.001	1.371
Unknown_765	Unknown				-0.396	<0.001	3.531	-0.380	<0.001	2.950	-0.372	<0.001	4.291	0.357	<0.001	2.701
Unknown_766	Unknown				-0.329	<0.001	1.967	-0.314	<0.001	1.804	-0.313	<0.001	1.953	0.279	<0.001	1.430
Unknown_767	Unknown				-0.352	<0.001	2.539	-0.338	<0.001	2.272	-0.339	<0.001	2.765	0.295	<0.001	1.721
Unknown_769	Unknown				-0.202	<0.001	0.339	-0.196	<0.001	0.283	-0.191	<0.001	0.534	0.183	<0.001	0.361
Unknown_77	Unknown													0.094	0.038	0.504
Unknown_770	Unknown				-0.316	<0.001	1.512	-0.299	<0.001	1.207	-0.310	<0.001	1.999	0.286	<0.001	1.442
Unknown_771	Unknown				-0.309	<0.001	1.552	-0.296	<0.001	1.331	-0.293	<0.001	1.836	0.276	<0.001	1.351
Unknown_772	Unknown				-0.401	<0.001	4.058	-0.389	<0.001	3.554	-0.372	<0.001	4.313	0.352	<0.001	3.144
Unknown_773	Unknown				-0.272	<0.001	0.946	-0.258	<0.001	0.831	-0.258	<0.001	1.111	0.235	<0.001	0.747
Unknown_774	Unknown				-0.279	<0.001	1.059	-0.268	<0.001	0.928	-0.260	<0.001	1.224	0.252	<0.001	0.929
Unknown_775	Unknown				-0.292	<0.001	1.105	-0.281	<0.001	0.978	-0.264	<0.001	1.332	0.265	<0.001	0.879
Unknown_776	Unknown													0.073	0.048	0.495
Unknown_781	Unknown				-0.158	0.001	0.502	-0.150	0.004	0.516	-0.140	0.004	0.276	0.162	<0.001	0.506
Unknown_782	Unknown				-0.076	0.046	0.678
Unknown_786	Unknown				-0.147	<0.001	0.040	-0.133	<0.001	0.060	-0.158	<0.001	0.224	0.107	0.002	0.005
Unknown_789	Unknown				-0.173	<0.001	0.301	-0.169	<0.001	0.243	-0.165	<0.001	1.171	0.113	0.005	0.004
Unknown_79	Unknown				-0.102	0.022	0.119	-0.106	0.024	0.086				0.127	0.001	0.881
Unknown_791	Unknown				-0.148	<0.001	0.009	-0.131	0.001	0.025	-0.168	<0.001	0.327	0.091	0.013	0.005
Unknown_794	Unknown				-0.239	<0.001	0.438	-0.226	<0.001	0.366	-0.232	<0.001	0.836	0.185	<0.001	0.187
Unknown_797	Unknown				-0.128	0.001	0.082	-0.114	0.008	0.038	-0.153	<0.001	0.825	0.129	0.001	0.004
Unknown_80	Unknown				-0.105	0.019	0.176	-0.107	0.022	0.137				0.144	<0.001	1.229
Unknown_800	Unknown													0.122	<0.001	0.030
Unknown_803	Unknown				-0.145	<0.001	0.004	-0.134	0.001	0.020	-0.140	<0.001	0.140	0.146	<0.001	0.284
Unknown_81	Unknown				0.123	<0.001	0.626	0.121	0.001	0.591	0.084	0.019	0.160	-0.097	0.003	0.041
Unknown_818	Unknown	-0.099	0.015	0.011
Unknown_83	Unknown													0.123	0.003	1.079
Unknown_834	Unknown				0.097	0.010	1.062	0.099	0.012	1.025				-0.095	0.006	0.249
Unknown_835	Unknown				-0.156	<0.001	0.068	-0.140	0.001	0.032	-0.171	<0.001	0.526	0.185	<0.001	0.676
Unknown_84	Unknown													0.143	<0.001	1.464
Unknown_841	Unknown													-0.115	0.002	0.790
Unknown_844	Unknown				0.134	<0.001	3.006	0.134	0.001	3.036				-0.189	<0.001	2.739
Unknown_85	Unknown													0.087	0.040	0.409
Unknown_854	Unknown													-0.074	0.050	0.044
Unknown_865	Unknown													0.082	0.038	0.317
Unknown_87	Unknown													0.103	0.019	1.109
Unknown_871	Unknown	0.122	0.004	1.886										-0.099	0.005	0.290
Unknown_874	Unknown	0.103	0.018	1.407										-0.084	0.024	0.511
Unknown_875	Unknown	-0.169	0.006	1.067
Unknown_876	Unknown	-0.121	0.006	0.785										0.078	0.043	0.132
Unknown_877	Unknown	-0.112	0.010	0.456
Unknown_880	Unknown	0.106	0.025	1.090										-0.130	0.001	1.120
Unknown_890	Unknown	-0.119	0.018	1.408
Unknown_892	Unknown	0.104	0.023	1.117							-0.086	0.046	0.321	0.090	0.019	0.047
Unknown_900	Unknown	-0.104	0.021	0.711	-0.093	0.025	0.634	-0.094	0.032	0.635				0.164	<0.001	2.252
Unknown_91	Unknown				-0.091	0.012	0.047	-0.094	0.013	0.069				0.092	0.006	0.256
Unknown_919	Unknown													0.114	0.029	1.152
Unknown_92	Unknown				0.092	0.020	0.942	0.098	0.019	1.009				-0.094	0.010	0.710
Unknown_921	Unknown	0.135	0.010	0.453
Unknown_932	Unknown													-0.103	0.004	0.508
Unknown_933	Unknown							0.102	0.037	0.384
Unknown_97	Unknown				0.133	<0.001	0.016	0.146	<0.001	0.004
Unknown_970	Unknown				-0.096	0.018	0.008	-0.089	0.041	0.011	-0.102	0.010	0.030
Unknown_974	Unknown							0.106	0.032	0.372
Unknown_980	Unknown				-0.108	0.018	0.102	-0.105	0.033	0.085	-0.095	0.046	0.067	0.104	0.014	0.169
Unknown_983	Unknown	0.131	0.002	2.743										-0.081	0.030	0.460
*Obtained from mixed-effect linear regression.The model adjusted for age, sex, site, change in BMI, baseline levels of lipid and the trait under investigation. Random effect was included in the model to account for correlations among family members.
FPG: fasting plasma glucose. FPI: fasting plasma insulin. HOMA-IR: measure of insulin resistance. HOMA-β: measure of β-cell function. QUICK: measure of insulin sensitivity. †Ve: variance explained (%).

## Sheet: S6-Lipid changes with 16-y T2D
Supplementary Table 6 - Associations between 5-year change (baseline to 5-year follow-up) in the 230 known lipids (whose longitudinal changes associated with one or more continuous T2D traits) and 16-year risk of T2D (q<0.05)
Lipid	Class	OR (95% CI)*
DAG(16:0/16:1)	Diacylglycerols	1.32 (1.11, 1.58)
DAG(34:1)	Diacylglycerols	1.36 (1.12, 1.64)
DAG(36:1)	Diacylglycerols	1.36 (1.13, 1.63)
LPC(24:0)	Phosphocholines	0.56 (0.42, 0.75)
PC(p-16:1/24:4)/PC(o-16:2/24:4)	Phosphocholines	0.65 (0.49, 0.85)
PC(p-34:0)/PC(o-34:1)	Phosphocholines	0.64 (0.49, 0.85)
TG(50:2)	Triacylglycerols	1.42 (1.14, 1.78)
TG(52:1)	Triacylglycerols	1.39 (1.13, 1.71)
TG(54:2)	Triacylglycerols	1.45 (1.17, 1.81)
TG(54:3)	Triacylglycerols	1.48 (1.16, 1.89)
†Odds ratio (OR) obtained from mixed-effect logistic regression. The model adjusted for age, sex, study site, BMI, fasting glucose, insulin resistance, HDL-cholesterol and total triglycerides at baseline. Random effect was included in the model to account for correlations among family members.
Bolded lipids were also significantly associated with 5-year risk of T2D and IFG

## Sheet: S7-Lipids with VIP>1.5
Supplementary Table 7 - Full list of plasma lipids with VIP greater than 1.5
Lipid	Class	VIP score*
CE(18:1)	Cholesterol esters	1.68182
CE(18:2)	Cholesterol esters	1.63491
CE(20:2)	Cholesterol esters	1.71355
CER(d34:0)	Ceramides	1.51857
CER(d36:1)	Ceramides	1.53817
DAG(16:0/16:0)	Diacylglycerols	2.13582
DAG(16:0/16:1)	Diacylglycerols	1.9273
DAG(34:1)	Diacylglycerols	2.14918
DAG(34:2)	Diacylglycerols	1.77671
DAG(36:1)	Diacylglycerols	2.13792
DAG(36:2)	Diacylglycerols	1.58462
LPC(20:4) B	Phosphocholines	1.66142
OxPC(16:0/18:1)	Phosphocholines	1.59765
PC(32:1)	Phosphocholines	1.59785
PC(35:4)	Phosphocholines	1.58891
PC(37:4)	Phosphocholines	1.63437
PC(38:3)	Phosphocholines	1.67378
PC(38:5) A	Phosphocholines	1.5819
PC(38:6) A	Phosphocholines	1.75356
PC(38:7)	Phosphocholines	1.98283
PC(39:6)	Phosphocholines	1.52848
PC(40:6) A	Phosphocholines	2.00326
PC(40:7) B	Phosphocholines	1.76748
PC(40:8)	Phosphocholines	1.78104
PC(p-16:1/24:4)/PC(o-16:2/24:4)	Phosphocholines	1.55278
PC(p-36:1)/PC(o-36:2) B	Phosphocholines	1.53776
PE(16:0/16:1)	Phosphoethanolamines	1.76838
PE(18:0/20:3)	Phosphoethanolamines	1.71193
PE(34:1)	Phosphoethanolamines	1.66956
PE(36:2)	Phosphoethanolamines	1.71816
PI(16:0/16:1)	Phosphoinositols	1.74116
SM(d34:0) B	Sphingomyelins	2.16479
SM(d36:0) A	Sphingomyelins	1.8666
SM(d36:0) B	Sphingomyelins	1.82069
SM(d36:3) A	Sphingomyelins	1.51432
SM(d40:0) A	Sphingomyelins	1.70685
SM(d40:2) B	Sphingomyelins	1.71583
SM(d41:2) B	Sphingomyelins	1.57889
TG(44:0)	Triacylglycerols	1.70315
TG(44:1)	Triacylglycerols	1.62626
TG(46:0)	Triacylglycerols	2.06396
TG(46:1)	Triacylglycerols	1.85316
TG(46:2)	Triacylglycerols	1.64094
TG(47:0)/TG(14:0/16:0/17:0)	Triacylglycerols	1.93692
TG(47:1)	Triacylglycerols	1.81384
TG(47:1)/TG(14:0/15:0/18:1)	Triacylglycerols	1.79591
TG(47:2)/TG(14:0/15:0/18:2)	Triacylglycerols	1.60872
TG(48:1)	Triacylglycerols	2.1021
TG(48:2)	Triacylglycerols	1.86453
TG(48:3)	Triacylglycerols	1.561
TG(49:0)	Triacylglycerols	1.90194
TG(49:1)	Triacylglycerols	1.94646
TG(49:2)	Triacylglycerols	1.70435
TG(50:0)	Triacylglycerols	2.13564
TG(50:2)	Triacylglycerols	2.0417
TG(50:3) A	Triacylglycerols	1.61482
TG(51:0)/TG(16:0/17:0/18:0)	Triacylglycerols	1.69957
TG(51:1)	Triacylglycerols	1.90638
TG(51:2)	Triacylglycerols	1.71436
TG(52:1)	Triacylglycerols	2.13226
TG(53:1)	Triacylglycerols	1.63578
TG(54:1)	Triacylglycerols	1.66826
TG(54:2)	Triacylglycerols	1.77038
TG(54:6)/TG(16:0/18:2/20:4)	Triacylglycerols	1.65906
TG(55:1)	Triacylglycerols	1.56709
TG(56:2)	Triacylglycerols	1.51217
TG(56:3)	Triacylglycerols	1.55175
Unknown_1008	Unknown	1.70181
Unknown_1078	Unknown	1.59616
Unknown_108	Unknown	1.80176
Unknown_1082	Unknown	1.65912
Unknown_1083	Unknown	1.56991
Unknown_1085	Unknown	1.94796
Unknown_110	Unknown	1.60893
Unknown_1129	Unknown	1.56118
Unknown_1132	Unknown	1.60313
Unknown_1133	Unknown	1.60021
Unknown_1161	Unknown	1.8721
Unknown_1207	Unknown	1.66169
Unknown_123	Unknown	1.75903
Unknown_142	Unknown	1.63044
Unknown_157	Unknown	1.51081
Unknown_197	Unknown	2.16746
Unknown_221	Unknown	1.58744
Unknown_222	Unknown	1.61527
Unknown_245	Unknown	1.60189
Unknown_280	Unknown	1.66666
Unknown_287	Unknown	1.69131
Unknown_319	Unknown	1.6867
Unknown_321	Unknown	1.70455
Unknown_322	Unknown	1.68501
Unknown_323	Unknown	1.71051
Unknown_324	Unknown	1.57485
Unknown_326	Unknown	1.50272
Unknown_349	Unknown	1.52627
Unknown_350	Unknown	1.75094
Unknown_364	Unknown	2.0589
Unknown_365	Unknown	2.0351
Unknown_367	Unknown	2.01525
Unknown_368	Unknown	2.07798
Unknown_369	Unknown	2.05947
Unknown_370	Unknown	1.63187
Unknown_391	Unknown	1.97479
Unknown_393	Unknown	2.26024
Unknown_394	Unknown	1.53773
Unknown_395	Unknown	1.84838
Unknown_403	Unknown	1.6094
Unknown_404	Unknown	1.57227
Unknown_411	Unknown	2.14091
Unknown_412	Unknown	1.96882
Unknown_413	Unknown	2.19496
Unknown_414	Unknown	2.05545
Unknown_415	Unknown	1.57385
Unknown_416	Unknown	1.58542
Unknown_421	Unknown	1.6992
Unknown_422	Unknown	1.70465
Unknown_428	Unknown	1.71074
Unknown_437	Unknown	2.04187
Unknown_438	Unknown	1.99022
Unknown_459	Unknown	1.58397
Unknown_464	Unknown	1.69469
Unknown_585	Unknown	1.50634
Unknown_59	Unknown	1.79686
Unknown_599	Unknown	1.50378
Unknown_75	Unknown	1.62595
Unknown_882	Unknown	1.54551
Unknown_919	Unknown	1.57465
Unknown_983	Unknown	1.59657
* Obtained from PLS-DA, adjusting for age, sex, study site, BMI, fasting glucose, insulin resistance, HDL-cholesterol and total triglycerides at baseline.

## Sheet: S8-Sensitivity analysis
Supplementary Table 8 - Results for sensitivity analysis (baseline lipids predict risk of T2D after 5-year follow-up) by further adjusting for diet, physical activity and lipid-lowering drugs
Lipid	Class	OR (95% CI)†	OR (95% CI)*
DAG(34:1)	Diacylglycerols	2.85 (1.86, 4.39)	2.84 (1.71, 4.72)
DAG(16:0/16:1)	Diacylglycerols	2.36 (1.47, 3.78)	2.24 (1.31, 3.83)
DAG(36:1)	Diacylglycerols	2.25 (1.49, 3.40)	2.37 (1.46, 3.83)
DAG(34:2)	Diacylglycerols	2.21 (1.44, 3.40)	2.17 (1.32, 3.58)
DAG(16:0/16:0)	Diacylglycerols	2.13 (1.45, 3.13)	2.15 (1.38, 3.37)
PC(38:3)	Phosphocholines	1.90 (1.31, 2.75)	1.90 (1.24, 2.89)
PC(32:0)	Phosphocholines	1.76 (1.24, 2.50)	1.53 (1.05, 2.23)
PC(38:2)	Phosphocholines	1.68 (1.22, 2.32)	1.73 (1.19, 2.49)
PE(18:0/20:3)	Phosphoethanolamines	2.02 (1.41, 2.90)	2.24 (1.47, 3.41)
PE(36:2)	Phosphoethanolamines	2.02 (1.36, 3.00)	2.15 (1.35, 3.43)
PE(34:1)	Phosphoethanolamines	1.94 (1.36, 2.77)	1.95 (1.29, 2.93)
PE(34:2) B	Phosphoethanolamines	1.91 (1.31, 2.77)	2.00 (1.30, 3.08)
PE(16:0/16:1)	Phosphoethanolamines	1.85 (1.32, 2.59)	1.77 (1.20, 2.59)
PE(16:0/18:3)	Phosphoethanolamines	1.79 (1.26, 2.55)	1.76 (1.19, 2.60)
PE(36:4) B	Phosphoethanolamines	1.78 (1.25, 2.54)	1.70 (1.14, 2.54)
PE(p-38:5)/PE(o-38:6) B	Phosphoethanolamines	1.76 (1.28, 2.42)	2.03 (1.37, 3.00)
PE(p-34:1)/PE(o-34:2) B	Phosphoethanolamines	1.65 (1.21, 2.25)	1.82 (1.27, 2.62)
LPE(22:4)	Phosphoethanolamines	1.62 (1.20, 2.18)	1.52 (1.09, 2.13)
PE(p-16:0/22:4)/PE(o-16:1/22:4)	Phosphoethanolamines	1.50 (1.19, 1.88)	1.61 (1.22, 2.11)
TG(48:1)	Triacylglycerols	2.16 (1.42, 3.26)	1.95 (1.23, 3.11)
TG(49:1)	Triacylglycerols	2.12 (1.42, 3.17)	2.06 (1.31, 3.25)
TG(52:1)	Triacylglycerols	2.10 (1.42, 3.12)	2.14 (1.36, 3.38)
TG(46:0)	Triacylglycerols	2.02 (1.41, 2.87)	2.06 (1.30, 3.25)
TG(51:1)	Triacylglycerols	2.02 (1.35, 3.01)	1.88 (1.26, 2.81)
TG(48:2)	Triacylglycerols	2.00 (1.30, 3.06)	1.79 (1.12, 2.85)
TG(47:0)/TG(14:0/16:0/17:0)	Triacylglycerols	1.94 (1.41, 2.68)	1.90 (1.32, 2.74)
TG(50:0)	Triacylglycerols	1.88 (1.35, 2.61)	1.88 (1.28, 2.76)
TG(47:1)	Triacylglycerols	1.87 (1.30, 2.69)	1.75 (1.16, 2.62)
TG(47:1)/TG(14:0/15:0/18:1)	Triacylglycerols	1.86 (1.29, 2.70)	1.73 (1.15, 2.60)
TG(49:0)	Triacylglycerols	1.85 (1.34, 2.57)	1.82 (1.26, 2.64)
TG(46:1)	Triacylglycerols	1.83 (1.25, 2.66)	1.62 (1.07, 2.45)
TG(51:0)/TG(16:0/17:0/18:0)	Triacylglycerols	1.68 (1.23, 2.29)	1.74 (1.22, 2.48)
TG(45:0)/TG(14:0/15:0/16:0)	Triacylglycerols	1.59 (1.19, 2.12)	1.55 (1.12, 2.15)
† Obtained from mixed-effect logistic regression. The model adjusted for age, sex, study site, BMI, fasting glucose, insulin resistance, HDL-cholesterol and total triglycerides at baseline. Random effect was included in the model to account for family correlations.
* Further adjusted for diet quality, physical activity and use of lipid-lowering drugs at baseline.
